# Supplementary material for: Radiomic Signatures Associated with CD8+ Tumour-Infiltrating Lymphocytes: A Systematic Review and Quality Assessment Study
Source: MDPI journal article supplement (doi:10.3390/cancers14153656), 2022-07-27
Supplement: s1 [file s1]

## Supplementary Materials

---

### Radiomic Signatures Associated with CD8<sup>+</sup> Tumour-Infiltrating Lymphocytes: A Systematic Review and Quality Assessment Study

Syafiq Ramlee, David Hulse, Kinga Bernatowicz,  
Raquel Pérez-López, Evis Sala, and Luigi Aloj

#### Figures

- **Figure S1:** QUADAS-2 and RQS assessments by the first reviewer.
- **Figure S2:** QUADAS-2 and RQS assessments by the second reviewer.

#### Tables (*refer to Excel sheet*)

- **Table S1:** PRISMA checklist.
- **Table S2:** Data extraction table for studies included in systematic review.
- **Table S3:** Study eligibility decision trail (for systematically-searched and manually-included articles) from the first reviewer.
- **Table S4:** Study eligibility decision trail (for systematically-searched and manually-included articles) from the second reviewer.
- **Table S5:** Description of technical radiomics terminology used in this systematic review.
- **Table S6:** List of relevant radiomics signatures from studies included in this systematic review.
- **Table S7:** Inter-rater agreement statistics for QUADAS-2 and RQS ratings.

Rater 1  
(S.R.)

|                    | Risk of bias      |            |                    |               | Applicability     |            |                    |
|--------------------|-------------------|------------|--------------------|---------------|-------------------|------------|--------------------|
|                    | Patient selection | Index test | Reference standard | Flow & timing | Patient selection | Index test | Reference standard |
| Lopci (2016)       | ⚠                 | 😊          | 😊                  | ⚠             | 😊                 | ?          | 😊                  |
| Castello (2018)    | ⚠                 | 😊          | 😊                  | ⚠             | 😊                 | ?          | 😊                  |
| Sun (2018)         | ⚠                 | 😊          | 😊                  | ?             | 😊                 | 😊          | 😊                  |
| Chen (2019)        | ⚠                 | 😊          | 😊                  | 😊             | 😊                 | ⚠          | 😊                  |
| Liao (2019)        | ⚠                 | 😊          | 😊                  | 😊             | 😊                 | ⚠          | 😊                  |
| Zhang (2020)       | ⚠                 | 😊          | 😊                  | ?             | ?                 | ⚠          | 😊                  |
| Jiang (2020)       | ⚠                 | 😊          | 😊                  | 😊             | 😊                 | 😊          | 😊                  |
| Mazzaschi (2020)   | ⚠                 | 😊          | 😊                  | ⚠             | 😊                 | ⚠          | 😊                  |
| Mitchell (2020)    | ⚠                 | ⚠          | 😊                  | 😊             | 😊                 | ?          | 😊                  |
| Katsoulakis (2020) | ⚠                 | 😊          | 😊                  | ?             | 😊                 | 😊          | 😊                  |
| Hsu (2020)         | ⚠                 | ⚠          | 😊                  | ?             | ?                 | ⚠          | 😊                  |
| Wen (2020)         | ⚠                 | 😊          | 😊                  | ?             | 😊                 | ⚠          | 😊                  |
| Zhang (2021)       | ⚠                 | 😊          | 😊                  | 😊             | 😊                 | ?          | 😊                  |
| Toulmonde (2020)   | ?                 | 😊          | 😊                  | ?             | 😊                 | ?          | 😊                  |
| Kim (2021)         | ?                 | 😊          | 😊                  | 😊             | ⚠                 | ?          | 😊                  |
| Wang (2021)        | ⚠                 | 😊          | 😊                  | ?             | 😊                 | ⚠          | ⚠                  |
| Ligero (2021)      | ⚠                 | 😊          | 😊                  | ⚠             | 😊                 | 😊          | 😊                  |
| Zhou (2021a)       | ⚠                 | 😊          | 😊                  | 😊             | 😊                 | ?          | 😊                  |
| Aoude (2021)       | ⚠                 | 😊          | 😊                  | ?             | ?                 | ?          | 😊                  |
| Arefan (2021)      | ⚠                 | 😊          | 😊                  | ?             | ?                 | ⚠          | 😊                  |
| Li (2021)          | ⚠                 | 😊          | 😊                  | ?             | 😊                 | ⚠          | 😊                  |
| Bian (2021a)       | ⚠                 | 😊          | 😊                  | 😊             | 😊                 | ⚠          | 😊                  |
| Jeon (2021)        | ⚠                 | 😊          | 😊                  | 😊             | 😊                 | ⚠          | 😊                  |
| Chaddad (2021)     | ?                 | 😊          | 😊                  | ?             | 😊                 | ⚠          | 😊                  |
| Bian (2021b)       | ⚠                 | 😊          | 😊                  | 😊             | 😊                 | ⚠          | 😊                  |
| Min (2021)         | ⚠                 | 😊          | 😊                  | 😊             | 😊                 | ⚠          | 😊                  |
| Zhou (2021b)       | ⚠                 | 😊          | 😊                  | 😊             | 😊                 | ⚠          | 😊                  |

Average

0.410.5200.042.111.000.740.851.630.5600.221.701.9300.0711.78

⚠ High risk/concern

😊 Low risk/concern

? Unclear risk/concern

Radiomics Quality Score

| Imaging protocol quality | Multiple segmentation | Phantom study | Multi time-point imaging | Feature reduction/robustness | Multivariable analysis | Biological correlates | Cut-off analyses | Discrimination statistics | Calibration statistics | Prospective study | Validation | 'Gold standard' comparison | Potential clinical utility | Cost-effectiveness analysis | Open science | Overall RQS |
|--------------------------|-----------------------|---------------|--------------------------|------------------------------|------------------------|-----------------------|------------------|---------------------------|------------------------|-------------------|------------|----------------------------|----------------------------|-----------------------------|--------------|-------------|
| 0                        | 0                     | 0             | 0                        | -3                           | 1                      | 1                     | 1                | 0                         | 0                      | 0                 | -5         | 0                          | 2                          | 0                           | 0            | -3          |
| 0                        | 0                     | 0             | 0                        | -3                           | 1                      | 1                     | 1                | 2                         | 0                      | 0                 | -5         | 2                          | 2                          | 0                           | 0            | 1           |
| 1                        | 1                     | 0             | 0                        | 3                            | 1                      | 1                     | 1                | 2                         | 0                      | 0                 | 5          | 2                          | 2                          | 0                           | 0            | 19          |
| 1                        | 1                     | 0             | 0                        | 3                            | 1                      | 1                     | 1                | 2                         | 1                      | 0                 | 2          | 2                          | 2                          | 0                           | 0            | 17          |
| 1                        | 1                     | 0             | 0                        | 3                            | 1                      | 1                     | 1                | 2                         | 0                      | 0                 | 2          | 2                          | 2                          | 0                           | 0            | 16          |
| 0                        | 0                     | 0             | 0                        | 3                            | 1                      | 0                     | 1                | 2                         | 0                      | 0                 | 2          | 2                          | 2                          | 0                           | 1            | 14          |
| 1                        | 1                     | 0             | 0                        | 3                            | 1                      | 1                     | 1                | 2                         | 2                      | 0                 | 5          | 2                          | 2                          | 0                           | 1            | 22          |
| 0                        | 0                     | 0             | 0                        | 3                            | 1                      | 1                     | 1                | 2                         | 0                      | 0                 | 2          | 2                          | 2                          | 0                           | 0            | 14          |
| 0                        | 1                     | 0             | 0                        | -3                           | 1                      | 1                     | 0                | 0                         | 0                      | 0                 | -5         | 2                          | 2                          | 0                           | 0            | -1          |
| 0                        | 0                     | 0             | 0                        | 3                            | 1                      | 1                     | 1                | 2                         | 0                      | 0                 | 3          | 2                          | 2                          | 0                           | 0            | 15          |
| 0                        | 0                     | 0             | 0                        | 3                            | 1                      | 1                     | 1                | 1                         | 0                      | 0                 | 2          | 2                          | 2                          | 0                           | 0            | 13          |
| 1                        | 1                     | 0             | 0                        | 3                            | 1                      | 0                     | 0                | 2                         | 0                      | 0                 | 2          | 2                          | 2                          | 0                           | 0            | 14          |
| 1                        | 1                     | 0             | 0                        | 3                            | 1                      | 1                     | 1                | 2                         | 2                      | 0                 | -5         | 2                          | 2                          | 0                           | 0            | 11          |
| 0                        | 0                     | 0             | 0                        | 3                            | 1                      | 0                     | 0                | 1                         | 0                      | ?                 | -5         | 0                          | 2                          | 0                           | 0            | 2           |
| 0                        | 0                     | 0             | 0                        | 3                            | 1                      | 1                     | 1                | 2                         | 0                      | ?                 | -5         | 2                          | 2                          | 0                           | 0            | 7           |
| 0                        | 0                     | 0             | 0                        | 3                            | 1                      | 1                     | 1                | 2                         | 0                      | 0                 | 2          | 2                          | 2                          | 0                           | 0            | 14          |
| 1                        | 1                     | 0             | 0                        | 3                            | 1                      | 1                     | 1                | 2                         | 2                      | 0                 | 3          | 2                          | 2                          | 0                           | 0            | 19          |
| 0                        | 0                     | 0             | 1                        | 3                            | 1                      | 1                     | 1                | 2                         | 0                      | 0                 | -5         | 2                          | 2                          | 0                           | 0            | 8           |
| 0                        | 0                     | 0             | 0                        | -3                           | 1                      | 0                     | 0                | 0                         | 0                      | 0                 | -5         | 2                          | 2                          | 0                           | 0            | -3          |
| 1                        | 0                     | 0             | 0                        | 3                            | 1                      | 0                     | 1                | 1                         | 0                      | 0                 | 2          | 0                          | 2                          | 0                           | 0            | 11          |
| 1                        | 1                     | 0             | 0                        | 3                            | 1                      | 1                     | 1                | 2                         | 2                      | 0                 | 2          | 2                          | 2                          | 0                           | 0            | 18          |
| 1                        | 1                     | 0             | 0                        | 3                            | 1                      | 0                     | 1                | 2                         | 2                      | 0                 | 2          | 2                          | 2                          | 0                           | 0            | 17          |
| 0                        | 1                     | 0             | 0                        | 3                            | 1                      | 1                     | 1                | 2                         | 0                      | 0                 | 2          | 2                          | 2                          | 0                           | 0            | 15          |
| 0                        | 0                     | 0             | 0                        | 3                            | 1                      | 1                     | 1                | 2                         | 0                      | ?                 | 2          | 2                          | 0                          | 0                           | 0            | 12          |
| 1                        | 1                     | 0             | 0                        | 3                            | 1                      | 0                     | 1                | 2                         | 2                      | 0                 | 2          | 2                          | 2                          | 0                           | 0            | 17          |
| 0                        | 1                     | 0             | 0                        | 3                            | 1                      | 1                     | 1                | 1                         | 0                      | 0                 | 2          | 0                          | 2                          | 0                           | 0            | 12          |
| 0                        | 1                     | 0             | 0                        | 3                            | 1                      | 1                     | 1                | 2                         | 2                      | 0                 | 2          | 2                          | 2                          | 0                           | 0            | 17          |

Figure S1: QUADAS-2 and RQS assessments by the first reviewer.

| QUADAS-2                                                                                       |                      |               |                       |                  |                      |               |                       | Radiomics Quality Score     |                          |                  |                             |                                  |                           |                          |                     |                              |                           |                      |            |                               |                               |                                |              |                |  |  |
|------------------------------------------------------------------------------------------------|----------------------|---------------|-----------------------|------------------|----------------------|---------------|-----------------------|-----------------------------|--------------------------|------------------|-----------------------------|----------------------------------|---------------------------|--------------------------|---------------------|------------------------------|---------------------------|----------------------|------------|-------------------------------|-------------------------------|--------------------------------|--------------|----------------|--|--|
| Rater 2<br>(D.H.)                                                                              | Risk of bias         |               |                       |                  | Applicability        |               |                       | Imaging protocol<br>quality | Multiple<br>segmentation | Phantom<br>study | Multi time-point<br>imaging | Feature reduction/<br>robustness | Multivariable<br>analysis | Biological<br>correlates | Cut-off<br>analyses | Discrimination<br>statistics | Calibration<br>statistics | Prospective<br>study | Validation | 'Gold standard'<br>comparison | Potential<br>clinical utility | Cost-effectiveness<br>analysis | Open science | Overall<br>RQS |  |  |
|                                                                                                | Patient<br>selection | Index<br>test | Reference<br>standard | Flow &<br>timing | Patient<br>selection | Index<br>test | Reference<br>standard |                             |                          |                  |                             |                                  |                           |                          |                     |                              |                           |                      |            |                               |                               |                                |              |                |  |  |
| Lopci (2016)                                                                                   | ⚠                    | 😊             | 😊                     | ⚠                | 😊                    | 😊             | 😊                     | 0                           | 0                        | 0                | 0                           | -3                               | 1                         | 1                        | 1                   | 1                            | 0                         | 0                    | -5         | 2                             | 2                             | 0                              | 0            | 0              |  |  |
| Castello (2018)                                                                                | ⚠                    | 😊             | 😊                     | ?                | 😊                    | 😊             | 😊                     | 0                           | 0                        | 0                | 0                           | -3                               | 1                         | 1                        | 1                   | 2                            | 0                         | 0                    | -5         | 2                             | 2                             | 0                              | 0            | 1              |  |  |
| Sun (2018)                                                                                     | ⚠                    | 😊             | 😊                     | 😊                | 😊                    | ⚠             | 😊                     | 1                           | 1                        | 0                | 0                           | 3                                | 1                         | 1                        | 1                   | 2                            | 1                         | 0                    | 4          | 2                             | 2                             | 0                              | 0            | 19             |  |  |
| Chen (2019)                                                                                    | ⚠                    | 😊             | 😊                     | 😊                | 😊                    | ⚠             | 😊                     | 1                           | 1                        | 0                | 0                           | 3                                | 1                         | 1                        | 1                   | 2                            | 0                         | 0                    | 2          | 2                             | 2                             | 0                              | 0            | 16             |  |  |
| Liao (2019)                                                                                    | ⚠                    | ?             | 😊                     | ?                | ?                    | ⚠             | 😊                     | 0                           | 0                        | 0                | 0                           | 3                                | 1                         | 1                        | 1                   | 1                            | 0                         | 0                    | 2          | 2                             | 2                             | 0                              | 0            | 13             |  |  |
| Zhang (2020)                                                                                   | ⚠                    | 😊             | 😊                     | ?                | 😊                    | ?             | 😊                     | 0                           | 0                        | 0                | 0                           | 3                                | 1                         | 0                        | 1                   | 2                            | 0                         | 0                    | 3          | 2                             | 2                             | 0                              | 1            | 15             |  |  |
| Jiang (2020)                                                                                   | ⚠                    | 😊             | 😊                     | ⚠                | 😊                    | ⚠             | 😊                     | 1                           | 1                        | 0                | 0                           | 3                                | 1                         | 1                        | 1                   | 2                            | 2                         | 0                    | 5          | 2                             | 2                             | 0                              | 1            | 22             |  |  |
| Mazzaschi (2020)                                                                               | ⚠                    | ⚠             | 😊                     | 😊                | 😊                    | ?             | 😊                     | 0                           | 0                        | 0                | 0                           | 3                                | 1                         | 1                        | 1                   | 2                            | 0                         | 0                    | 2          | 2                             | 2                             | 0                              | 0            | 14             |  |  |
| Mitchell (2020)                                                                                | ⚠                    | 😊             | 😊                     | ?                | 😊                    | ?             | 😊                     | 0                           | 0                        | 0                | 0                           | -3                               | 1                         | 1                        | 0                   | 1                            | 0                         | 0                    | -5         | 0                             | 2                             | 0                              | 0            | -3             |  |  |
| Katsoulakis (2020)                                                                             | ⚠                    | 😊             | 😊                     | ?                | 😊                    | ⚠             | 😊                     | 1                           | 1                        | 0                | 0                           | 3                                | 1                         | 1                        | 0                   | 2                            | 0                         | 0                    | 2          | 2                             | 2                             | 0                              | 0            | 15             |  |  |
| Hsu (2020)                                                                                     | ⚠                    | 😊             | 😊                     | 😊                | 😊                    | ?             | 😊                     | 0                           | 0                        | 0                | 0                           | 3                                | 1                         | 0                        | 1                   | 2                            | 0                         | 0                    | 2          | 2                             | 2                             | 0                              | 0            | 13             |  |  |
| Wen (2020)                                                                                     | ⚠                    | 😊             | 😊                     | ?                | ?                    | ?             | 😊                     | 1                           | 1                        | 0                | 0                           | 3                                | 1                         | 0                        | 0                   | 1                            | 0                         | 0                    | 2          | 2                             | 2                             | 0                              | 0            | 13             |  |  |
| Zhang (2021)                                                                                   | ⚠                    | 😊             | 😊                     | ?                | ?                    | ⚠             | 😊                     | 0                           | 0                        | 0                | 0                           | 3                                | 1                         | 0                        | 1                   | 1                            | 0                         | 0                    | -5         | 0                             | 2                             | 0                              | 0            | 3              |  |  |
| Toulmonde (2020)                                                                               | ⚠                    | 😊             | 😊                     | 😊                | 😊                    | ⚠             | 😊                     | 2                           | 0                        | 0                | 0                           | 3                                | 1                         | 0                        | 0                   | 1                            | 1                         | 0                    | -5         | 0                             | 2                             | 0                              | 0            | 5              |  |  |
| Kim (2021)                                                                                     | ⚠                    | 😊             | 😊                     | 😊                | 😊                    | ⚠             | 😊                     | 0                           | 0                        | 0                | 0                           | 3                                | 1                         | 1                        | 1                   | 2                            | 0                         | 0                    | -5         | 2                             | 2                             | 0                              | 0            | 7              |  |  |
| Wang (2021)                                                                                    | ⚠                    | 😊             | 😊                     | 😊                | 😊                    | ⚠             | 😊                     | 0                           | 1                        | 0                | 0                           | 3                                | 1                         | 1                        | 1                   | 2                            | 0                         | 0                    | 2          | 2                             | 2                             | 0                              | 0            | 15             |  |  |
| Ligero (2021)                                                                                  | ⚠                    | 😊             | 😊                     | ?                | 😊                    | ⚠             | 😊                     | 1                           | 1                        | 0                | 0                           | 3                                | 1                         | 1                        | 1                   | 2                            | 1                         | 0                    | 3          | 2                             | 2                             | 0                              | 0            | 18             |  |  |
| Zhou (2021a)                                                                                   | ⚠                    | 😊             | 😊                     | ?                | 😊                    | ⚠             | 😊                     | 1                           | 1                        | 0                | 0                           | 3                                | 1                         | 1                        | 1                   | 2                            | 2                         | 0                    | -5         | 2                             | 2                             | 0                              | 0            | 11             |  |  |
| Aoude (2021)                                                                                   | ⚠                    | 😊             | 😊                     | ⚠                | 😊                    | ?             | 😊                     | 0                           | 0                        | 0                | 0                           | -3                               | 1                         | 1                        | 1                   | 2                            | 0                         | 0                    | -5         | 2                             | 2                             | 0                              | 0            | 1              |  |  |
| Arefan (2021)                                                                                  | ⚠                    | 😊             | 😊                     | ?                | 😊                    | ⚠             | 😊                     | 0                           | 1                        | 0                | 0                           | 3                                | 1                         | 1                        | 1                   | 1                            | 0                         | 0                    | 2          | 0                             | 2                             | 0                              | 0            | 12             |  |  |
| Li (2021)                                                                                      | ⚠                    | 😊             | 😊                     | ?                | 😊                    | ⚠             | 😊                     | 0                           | 0                        | 0                | 0                           | 3                                | 1                         | 1                        | 1                   | 2                            | 0                         | 0                    | 2          | 2                             | 2                             | 0                              | 0            | 14             |  |  |
| Bian (2021a)                                                                                   | ⚠                    | 😊             | 😊                     | 😊                | 😊                    | ⚠             | 😊                     | 1                           | 1                        | 0                | 0                           | 3                                | 1                         | 1                        | 1                   | 2                            | 2                         | 0                    | 2          | 2                             | 2                             | 0                              | 0            | 18             |  |  |
| Jeon (2021)                                                                                    | ⚠                    | 😊             | 😊                     | 😊                | 😊                    | ⚠             | 😊                     | 1                           | 1                        | 0                | 0                           | 3                                | 1                         | 1                        | 1                   | 2                            | 0                         | 0                    | 2          | 2                             | 2                             | 0                              | 0            | 16             |  |  |
| Chaddad (2021)                                                                                 | ⚠                    | 😊             | 😊                     | ⚠                | 😊                    | ?             | 😊                     | 0                           | 0                        | 0                | 0                           | 3                                | 1                         | 1                        | 1                   | 2                            | 0                         | 0                    | 3          | 2                             | 0                             | 0                              | 1            | 14             |  |  |
| Bian (2021b)                                                                                   | ⚠                    | 😊             | 😊                     | 😊                | 😊                    | ?             | 😊                     | 1                           | 1                        | 0                | 0                           | 3                                | 1                         | 1                        | 1                   | 2                            | 2                         | 0                    | 2          | 2                             | 2                             | 0                              | 0            | 18             |  |  |
| Min (2021)                                                                                     | ⚠                    | 😊             | 😊                     | ?                | 😊                    | ⚠             | 😊                     | 0                           | 0                        | 0                | 0                           | 3                                | 1                         | 1                        | 1                   | 2                            | 0                         | 0                    | 2          | 2                             | 0                             | 0                              | 0            | 12             |  |  |
| Zhou (2021b)                                                                                   | ⚠                    | 😊             | 😊                     | ?                | 😊                    | ⚠             | 😊                     | 1                           | 1                        | 0                | 0                           | 3                                | 1                         | 1                        | 1                   | 2                            | 2                         | 0                    | 2          | 2                             | 2                             | 0                              | 0            | 18             |  |  |
| Average                                                                                        | 0.48                 | 0.48          | 0                     | 0                | 2.11                 | 1.00          | 0.81                  | 0.85                        | 1.74                     | 0.48             | 0                           | 0.22                             | 1.70                      | 1.85                     | 0                   | 0.11                         | 11.85                     |                      |            |                               |                               |                                |              |                |  |  |
| <div>⚠ High risk/concern</div> <div>😊 Low risk/concern</div> <div>? Unclear risk/concern</div> |                      |               |                       |                  |                      |               |                       |                             |                          |                  |                             |                                  |                           |                          |                     |                              |                           |                      |            |                               |                               |                                |              |                |  |  |

**Figure S2:** QUADAS-2 and RQS assessments by the second reviewer.
